# Supplementary material for: In vitro analysis suggests that SARS-CoV-2 infection differentially modulates cancer-like phenotypes and cytokine expression in colorectal and prostate cancer cells
Source: PubMed Central journal article supplement (PMC11490510; doi:10.1038/s41598-024-75718-1), 2024-10-19
Supplement: 41598_2024_75718_MOESM1_ESM.pdf [file 41598_2024_75718_MOESM1_ESM.pdf]

***In vitro* analysis suggests that SARS-CoV-2 infection differentially modulates cancer-like phenotypes and cytokine expression in colorectal and prostate cancer cells.**

Alberta Serwaa<sup>1,2</sup>, Fatima Oyawoye<sup>1</sup>, Irene Amoakoh Owusu<sup>1</sup>, Daniel Dosoo<sup>1</sup>, Aaron Adom Manu<sup>1,2</sup>, Augustine Kojo Sobo<sup>1,2</sup>, Kwadwo Fosu<sup>1,2</sup>, Charles Ochieng' Olwal<sup>1,2</sup>, Peter Kojo Quashie<sup>1,3\*</sup>, Anastasia Rosebud Aikins<sup>1,2\*</sup>

<sup>1</sup> West African Centre for Cell Biology of Infectious Pathogens (WACCBIP), College of Basic and Applied Sciences, University of Ghana, Ghana

<sup>2</sup> Biochemistry, Cell, and Molecular Biology, College of Basic and Applied Sciences, University of Ghana, Accra, Ghana

<sup>3</sup> Francis Crick Institute, 1 Midland Road, London, NW1 1AT, United Kingdom

**Figure S1. ACE2 expression in various cancer cell lines.**

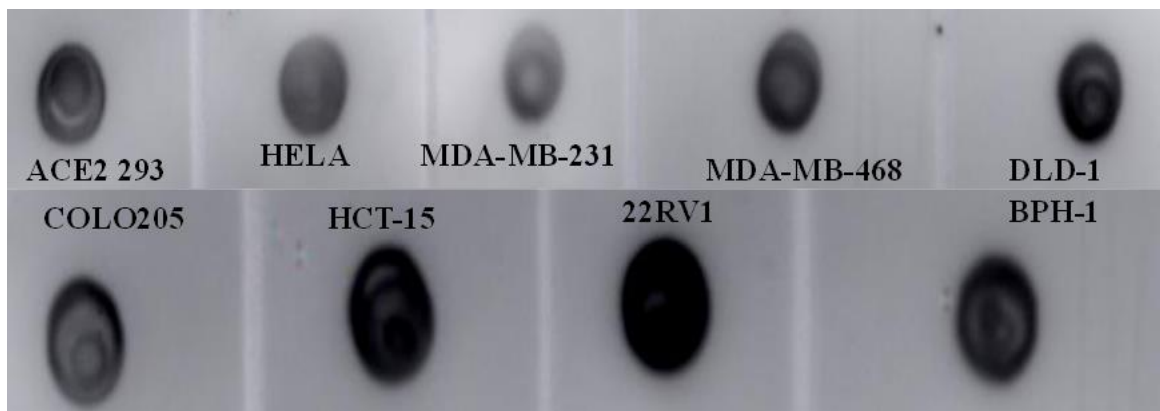

**Figure S2. SARS-CoV-2 Infection may not significantly affect 22RV1 migration but reduces DLD-1 cell migration.** A diagram showing representative wound healing images of (a) uninfected and SARS-CoV-2 infected 22RV1 cell lines at different time points and (b) uninfected and SARS-CoV-2 infected DLD-1 cell lines at different time points. Magnification x100. Clear dark area = wound area. White patched area = area covered with cells.

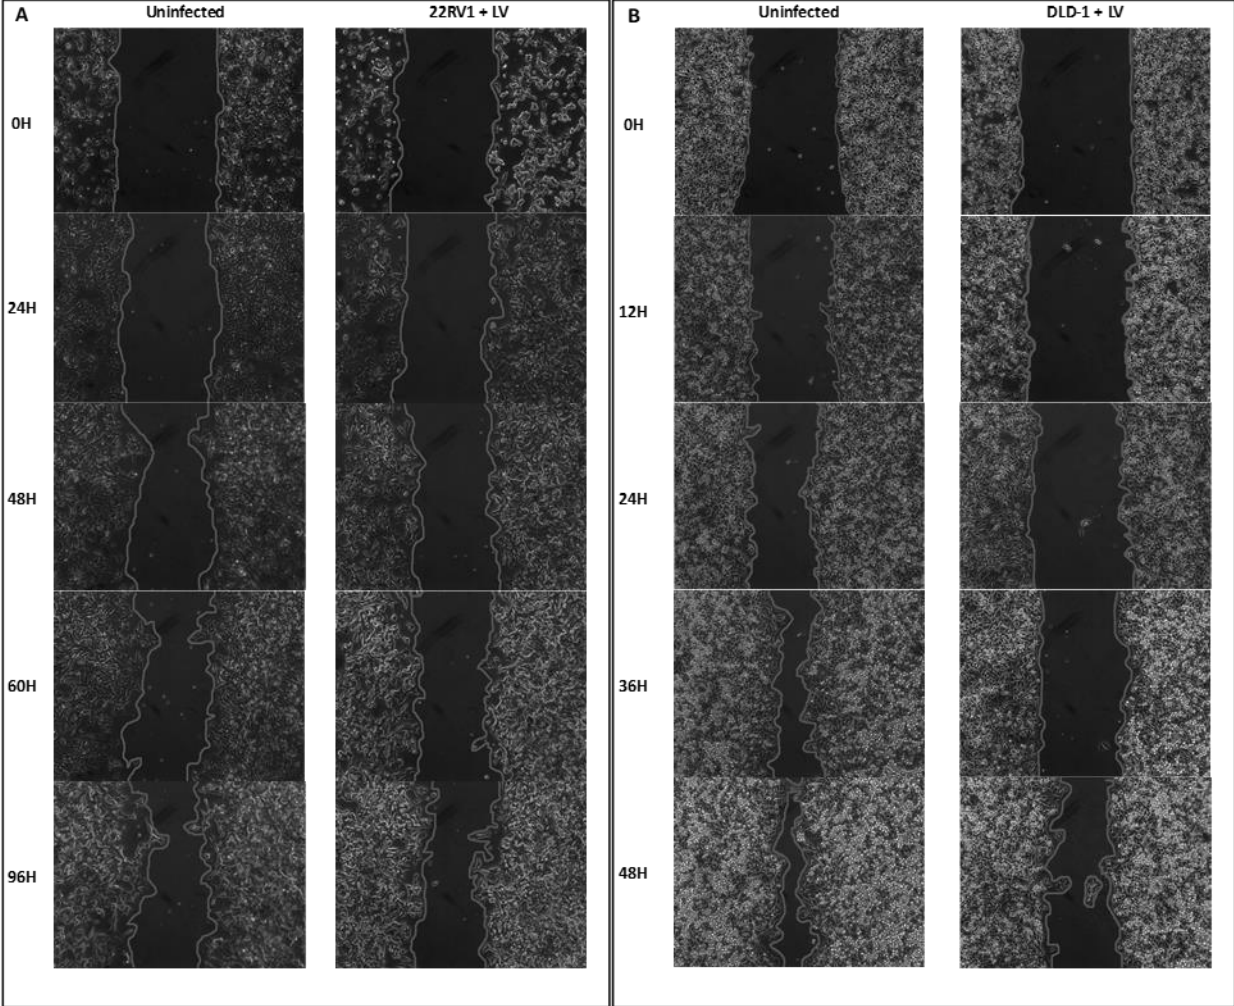

## Tables

**Table S1. Oligonucleotide sequences used in this study.**

| Target Gene                    | Set     | Sequence (5'-3')         | Annealing temperature (°C) | References |
|--------------------------------|---------|--------------------------|----------------------------|------------|
| <b>VEGF</b>                    | Forward | CTCTACCTCCACCATGCCAAGT   | 60                         | 1,2        |
|                                | Reverse | TCGATTGGATGGCAGTAGCTG    |                            |            |
| <b>BCL-2</b>                   | Forward | TGCACCTGACGCCCTTCAC      | 59                         | 3          |
|                                | Reverse | AGACAGCCAGGAGAAATCAAACAG |                            |            |
| <b>KI-67</b>                   | Forward | AATTCAGACTCCATGTGCCTGAG  | 60                         | 4          |
|                                | Reverse | CTTGACACACACATTGTCCTCAGC |                            |            |
| <b>MMP9</b>                    | Forward | ACGCACGACGTCTTCCAGTA     | 61                         | 5          |
|                                | Reverse | CCACCTGGTTCAACTCACTCC    |                            |            |
| <b>VIM</b>                     | Forward | TCTCTGAGGCTGCCAACCG      | 62                         | 6          |
|                                | Reverse | CGAAGGTGACGAGCCATTTCC    |                            |            |
| <b>TNF-<math>\alpha</math></b> | Forward | AGTGACAAGCCTGTAGCCC      | 57                         | 7          |
|                                | Reverse | GCAATGATCCCAAAGTAGACC    |                            |            |
| <b>IL-1<math>\beta</math></b>  | Forward | GCACGATGCACCTGTACGAT     | 59                         | 8          |
|                                | Reverse | CACCAAGCTTTTTTGCTGTGAGT  |                            |            |
| <b>IL-6</b>                    | Forward | CAATGAGGAGACTTGCCTGGTGA  | 62                         | 9,10       |
|                                | Reverse | TGGCATTGTGGTTGGGTCAG     |                            |            |
| <b>IL-8</b>                    | Forward | CACCGGAAGGAACCATCTCACT   | 59                         | 10         |
|                                | Reverse | TCAGCCCTCTTCAAAAATTCTCC  |                            |            |
| <b>GAPDH</b>                   | Forward | TGCACCACCAACTGCTTA       | 60                         | 11         |
|                                | Reverse | GGATGCAGGGATGATGTTT      |                            |            |

## References

1. Herkenne, S. *et al.* Developmental and Tumor Angiogenesis Requires the Mitochondria-Shaping Protein Opa1. *Cell Metab.* **31**, 987-1003.e8 (2020).
2. Norol, F. *et al.* GFP-transduced CD34+ and Lin- CD34- hematopoietic stem cells did not adopt a cardiac phenotype in a nonhuman primate model of myocardial infarct. *Exp. Hematol.* **35**, 653–661 (2007).
3. Sun, H. *et al.* A newly identified G-quadruplex as a potential target regulating Bcl-2 expression. *Biochim. Biophys. Acta - Gen. Subj.* **1840**, 3052–3057 (2014).
4. Bai, Y. *et al.* Ki-67 is overexpressed in human laryngeal carcinoma and contributes to the proliferation of HEP2 cells. *Oncol. Lett.* **12**, 2641–2647 (2016).
5. Fan, Y. *et al.* NLRC5 promotes cell migration and invasion by activating the PI3K/AKT signaling pathway in endometrial cancer. *J. Int. Med. Res.* **48**, 1–13 (2020).
6. Sittiju, P. *et al.* Osteosarcoma-Specific Genes as a Diagnostic Tool and Clinical Predictor of Tumor Progression. *Biology (Basel).* **11**, 1–14 (2022).

7. Zhao, C., Lu, X., Bu, X., Zhang, N. & Wang, W. Involvement of tumor necrosis factor- $\alpha$  in the upregulation of CXCR4 expression in gastric cancer induced by *Helicobacter pylori*. *BMC Cancer* **10**, 419 (2010).
8. Bhat, I. A. *et al.* Association of interleukin 1 beta (IL-1 $\beta$ ) polymorphism with mRNA expression and risk of non small cell lung cancer. *Meta Gene* **2**, 123–133 (2014).
9. Liu, D., Perkins, J. T., Petriello, M. C. & Hennig, B. Exposure to coplanar PCBs induces endothelial cell inflammation through epigenetic regulation of NF- $\kappa$ B subunit p65. *Toxicol. Appl. Pharmacol.* **289**, 457–465 (2015).
10. Zhao, W. *et al.* Activation of Rev-erba attenuates lipopolysaccharide-induced inflammatory reactions in human endometrial stroma cells via suppressing TLR4-regulated NF- $\kappa$ B activation. *Acta Biochim. Biophys. Sin. (Shanghai)*. **51**, 908–914 (2019).
11. Wu, D. *et al.* Long noncoding RNA NNT-AS1 enhances the malignant phenotype of bladder cancer by acting as a competing endogenous RNA on microRNA-496 thereby increasing HMGB1 expression. *Aging (Albany, NY)*. **11**, 12624–12640 (2019).
